1 Women empowerment and utilization of HIV testing among couples  
2 in Zambia: Evidence from the Zambia Demographic and Health  
3 Survey 2018

4 Whiteson Mbele<sup>1,2,¶\*</sup>, Phyllis Dako-Gyeke<sup>1,¶</sup>, Andreas Ndapewa Frans<sup>1, &</sup>, Jordanne Ching<sup>1</sup>

5 <sup>1</sup> Department of Social and Behavioral Sciences, School of Public Health, College of Health Sciences,  
6 University of Ghana, Accra, Ghana

7 <sup>2</sup> Kasiya Mission Hospital, Pemba District Health Office, Southern Province, Zambia

8 \* Corresponding author

9 Email: whitesonmbele@gmail.com

10 ¶ These authors contributed equally to this work

11 & These authors also contributed equally to this work.

## 12 Abstract

13 In Zambia, women are disproportionately more affected by HIV compared to men. This has mainly been  
14 attributed to harmful gender norms that enhance male dominance and disempower women,  
15 preventing them from exercising their right to negotiate for safe sex and utilizing HIV prevention  
16 services such as HIV testing. This study examined associations between women's empowerment and  
17 HIV testing among married and partnered women.

18 We analyzed secondary data from the couple's recode of the 2018 Zambia demographic and health  
19 survey. Univariable and multivariable logistic regression analysis was conducted, and  $p < 0.05$  was  
20 considered statistically significant. We included a total of 5,328 married and partnered women in the  
21 analysis, of which 5057 (94.9%) had undergone an HIV test before. After adjusting for confounders,  
22 decision-making was the only independent predictor of HIV testing among measures of empowerment.  
23 Women who were highly empowered in decision-making were more likely to have undergone an HIV  
24 test compared to those who were lowly empowered (AOR = 2.1; 95% CI: 1.5, 2.9). Women aged 20-29  
25 years (AOR = 2.4; 95% CI: 1.6, 3.6), 30-39 years (AOR = 5.3; 95% CI: 3.4, 8.2), or 40-49 years (AOR = 2.9;  
26 95% CI: 1.9, 4.7), those with primary education (AOR = 2.4; 95% CI: 1.7, 3.4) or secondary and higher  
27 (AOR = 4.1; 95% CI: 2.3, 7.2), rich women (AOR = 2.4; 95% CI: 1.5, 3.7) or women with middle wealth  
28 (AOR = 1.5; 95% CI: 1.1, 2.2) and those who gave birth in the last 5 years (AOR = 3.3; 95% CI: 2.5, 4.5)  
29 were more likely to have been tested for HIV. This study highlights the critical influence of women's  
30 empowerment in decision-making on HIV testing. Additionally, level of education, wealth, age, and  
31 having given birth before are essential factors to consider in promoting HIV testing among women in  
32 Zambia.

## 33 Introduction

34 Of the estimated 39 million people living with HIV and AIDS globally in 2022, more than half (53%) were  
35 Women and girls [1]. In Sub-Saharan Africa, over 63% of all new HIV infections occur among Women  
36 and girls [1]. Women's access to HIV prevention services, such as HIV testing depends significantly on  
37 the level of empowerment. Women who are empowered can make independent decisions regarding  
38 their health, including HIV testing without depending on their husbands or partners. Empowered  
39 women can negotiate for safer sex with their partners, reducing the chances of risky sexual behaviors  
40 [2]. However, harmful gender norms that enhance male dominance prevent women from exercising  
41 their right to negotiate for safe sex and utilize HIV prevention services such as HIV testing, putting them  
42 at a disproportionately higher risk of HIV transmission [3]. To address gendered risks of HIV transmission,  
43 a call for strategies that address female disempowerment has been made [4].

44 The ability of Women to exercise their sexual and reproductive rights is crucial in achieving gender  
45 equity and equality in health. Among married or cohabiting couples, gender norms that limit Women's  
46 decision-making power about their sexual and reproductive rights are key drivers of HIV transmission  
47 [5,6]. It is evident from previous studies that a large proportion of HIV infections occur within marital or  
48 cohabiting relationships [5–9]. Women are only empowered if they consider themselves to have the  
49 right and be able to make independent decisions about their health [10]. However, gender norms that  
50 promote Women's subordination and justify men's dominance are key obstacles to Women's  
51 empowerment and affect the ability of Women to protect themselves from sexually transmitted  
52 infections (STIs), including HIV [11,12]. In Zambia for example, the cultural expectation of submission  
53 and obedience of Women and girls to their partners has promoted male dominance, leaving women

54 with little voice [13]. This has resulted in a disproportion in HIV transmission between boys and girls,  
55 with girls and young women carrying the heaviest burden of HIV prevalence (13%) compared to boys  
56 and men (7%) [13,14].

57 The significance of women's empowerment in addressing the HIV epidemic cannot be overstated.  
58 Empowerment plays a pivotal role in instilling confidence among women to undergo HIV testing. This  
59 newfound confidence not only allows women to ascertain their HIV status but also empowers them to  
60 take preventive measures, such as averting mother-to-child transmission of HIV (MTCT) and minimizing  
61 the risk of transmitting the virus to their partners [15]. The extent to which a woman has been  
62 empowered significantly influences her accessibility to HIV testing. An empowered woman, whether  
63 through cultural, political, or professional means, is more likely to autonomously decide to undergo HIV  
64 testing [15]. Such empowerment liberates her from dependency on her husband or partner for  
65 decisions related to HIV testing, fostering a proactive approach to her healthcare. In Zambia, HIV testing  
66 among pregnant women declined from 85% in 2013 to 82% in 2018 [16]. The underutilization of HIV  
67 testing services in Zambia has been attributed to factors such as social relations [18], gender  
68 inequalities [19–21], and individual beliefs and perceptions [22].

69 To increase the ability of women to make independent decisions regarding their health, including HIV  
70 testing, Zambia strengthened its policy and legal frameworks for promoting gender equality and  
71 women empowerment [23]. The country has observed a positive drop in the gender inequality index  
72 from 0.627 in 2011 to 0.540 in 2021 [24,25]. Despite this step in the right direction, the country is still  
73 ranked low on gender gap reduction and inequalities, sitting at 138 out of 195 countries in the gender  
74 inequality index [25]. The slow pace of the attainment of women's empowerment and gender equality  
75 in Zambia has been attributed to factors such as the conservation of cultural values that disempower

76 women in decision-making [24]. Empowerment has been variably defined, with limited data for  
77 comparisons across countries, especially in Sub-Saharan Africa [26–28]. With the growing need for a  
78 reliable indicator to measure and track progress on women and girls empowerment, several  
79 empowerment indicators have been proposed and contextualized [26–29]. The Survey-based Women’s  
80 empowerment Index (SWPER) is one such indicator developed in 2017 for use in Low- and Middle-  
81 Income countries in the African context to address the need for a single consistent measure of Women  
82 empowerment [29]. The SWPER was validated using Demographic and health survey (DHS) data from  
83 34 African countries and attracted interest from international agencies and the academic community  
84 [29]. In 2020, the SWPER was expanded beyond Africa to all low and middle-income countries (LMICs)  
85 to make it a global monitoring tool [30]. The indicator measures three domains of empowerment  
86 namely, attitude to violence, social independence, and decision making using fourteen questions [30].  
87 The indicator uses individual-level data which allows for the assessment of associations between  
88 empowerment and several health interventions or outcomes [29]. Because of its global validation, the  
89 SWPER allows for not only within-country comparisons but also between-country comparisons as well  
90 as time and trend analysis as new data emerge [30]. Despite the robustness and novelty of the SWPER  
91 index in assessing associations between measures of women empowerment and health-related  
92 outcomes, the tool has not been utilized in Zambia to unravel the challenge of underutilization of HIV  
93 testing services among women in the country.

94 This study therefore assessed the effects of women's empowerment on HIV testing among couples in  
95 Zambia, employing the SWPER index as a measure of empowerment. To the best of our knowledge, this  
96 was the first study to utilize the novel, globally standardized SWPER indicator to determine the  
97 influence of Women's empowerment on HIV testing among Zambian women. Results from this study

98 will set the baseline for monitoring of progress made on Women empowerment in Zambia and identify  
99 areas for priority in HIV testing programs.

100

101

102

103

104

105

106

107

108

109

110

111

112

113

114

## 115 Materials and methods

### 116 Study area

117 The area for this study was Zambia. The Republic of Zambia is in Southern Africa and is one of the low-  
118 income countries. The country has a population of 19,610,769 with a male population of 9,603,056 and  
119 a female population of 10,007,713 according to the 2022 national census [31]. Zambia is one of the  
120 countries possessing biased gender social norms, with a Gender Inequality Index (GII) of 0.540 in 2021,  
121 ranking 138 out of 195 countries globally [25]. This has resulted in gender inequities in health with  
122 resultant higher HIV infection among females compared to males in the country [32–36], impeding the  
123 achievement of sustainable development goal 5 (SDG 5). Moreover, the country recorded a drop of  
124 43.7% in HIV testing in 2020 compared to 2019 [17]. The country has an ambitious goal of achieving the  
125 joint United Nations Program on HIV/AIDS (UNAIDS) “95-95-95” targets which state that by 2030, 95%  
126 of people living with HIV should be aware of their status, 95% of those aware of their status should be  
127 on antiretroviral therapy (ART), and 95% of those on ART should be virally suppressed [17]. The  
128 country made commendable progress in achieving the targets in 2021, where 98% of those who were  
129 aware of their HIV status were on treatment, and 96% of those on treatment were virally suppressed  
130 [37]. However, only 89% of adults aged 15 years and older knew their status, indicating there is still a  
131 gap in HIV testing [37]. To achieve the UNAIDS 95-95-95 targets by 2030 in Zambia, there is a need for  
132 interventions that enhance HIV testing.

133

134

## 135 Study design and data source

136 This was a cross-sectional study that utilized secondary data from the couples recode file of the 2018  
137 Zambia demographic and health survey (2018 ZDHS). The 2018 ZDHS was implemented by the Zambia  
138 Statistics Agency in partnership with the Ministry of Health, and data was collected from July 2018 to  
139 January 2019. This was the 6th Demographic and Health Survey conducted in Zambia since 1992 as  
140 part of several surveys obtained from the MEASURE DHS program, to provide reliable national  
141 estimates of demographic and health indicators such as gender relations, sexual and reproductive  
142 health, and other health issues relevant to the achievement of SDG's. The DHS is a reliable source of  
143 individual-level information on socio-economic characteristics, health, and development indicators in  
144 LMICs. Since 1999, the surveys have incorporated questions on women's empowerment that  
145 potentially allow for within and between countries comparisons using an intersectional lens [30]. The  
146 2018 ZDHS included a nationally representative sample of 13,683 women aged between 15-49 years  
147 and 12,132 men aged between 15-59 years in 12,831 households, with a response rate of 96% among  
148 women and 92% among men. The sample design provided estimates at the national level, for both  
149 urban and rural areas, and each of the 10 provinces in the country.

## 150 Sampling frame

151 The sampling frame used for the 2018 ZDHS is based on the Census of Population and Housing  
152 conducted in 2010. Zambia is divided into 10 provinces, and each province is subdivided into districts,  
153 each district into constituencies, and each constituency into wards. Additionally, wards are subdivided  
154 into convenient areas called census supervisory areas (CSAs) which are further subdivided into  
155 Standard Enumeration Areas (SEAs). The list of SEAs was used as the sampling frame for the 2018 ZDHS.



## 156 Sampling

157 The survey used a stratified two-stage sample design. Each of the 10 provinces was stratified into urban  
158 and rural areas and this yielded 20 sampling strata. Samples of SEAs were selected independently from  
159 each stratum in two stages. In the first stage, 545 SEAs (198 Urban and 347 Rural) were selected with  
160 probability proportional to SEA size and with independent selection in each sampling stratum. The SEA  
161 size was the number of residential households residing in the SEA based on the sampling frame. A  
162 household listing was carried out in all the selected sample SEAs and the resulting lists of households  
163 served as the sampling frame for the second stage of sampling. In the second stage of sampling, a fixed  
164 number of 25 households per cluster was sampled from each cluster using equal probability systematic  
165 sampling from the newly created household listing. All women aged 15-49 years and men aged 15-59  
166 years who were usual members of the selected households or who spent the night before the survey in  
167 the selected households were eligible for the woman's questionnaire and the man's questionnaire,  
168 respectively. Our study was restricted to married/partnered Women with a focus on the couples recode  
169 section of the data since the SWPER index considers only married or partnered women. Women with  
170 incomplete information on any variable of interest were excluded from the analysis. A total of 13,683  
171 women completed the survey, of which 5,560 were either married or living with a partner. Of the 5,560  
172 coupled women, 5,328 had values to all variables of interest and thus were included in the analysis  
173 while 232 women had missing variables and were excluded. Therefore, this study analyzed data of  
174 5,328 married/partnered women. Details of the sample selection are illustrated in Fig 1

175 **Fig 1. Flow chart of sample selection**

176

## 177 **Dependent variable**

178 The dependent variable in this study was self-reported HIV testing, measured with two outcomes  
179 (yes/no). Women who responded “yes” to the question “Have you ever tested for HIV” were  
180 categorized as having tested for HIV and assigned a code of 1 while respondents who answered “no” to  
181 this question were categorized as never tested for HIV and assigned a code of 0 for this variable.

## 182 **Independent variables**

183 Independent variables were categorized into socio-demographic and empowerment measures. The  
184 choice and categorization of these variables were based on data from existing studies [38–41]. Socio-  
185 demographic factors included in the study were participants’ ages (<20, 20-29, 30-39, and 40-49 years),  
186 type of residence (Rural, Urban), education level collapsed into three categories (No education,  
187 primary, secondary or higher), Wealth index collapsed into three categories (poor, middle, rich),  
188 working status (working, not working), health insurance coverage (yes, no), and number of unions  
189 (once, more than once). Women's empowerment included three domains of the SWPER global index  
190 [30]. The SWPER global measures three domains of empowerment using 14 items from the DHS  
191 surveys. Five items are related to Women’s opinion on justification of husbands beating their wives in  
192 specific situations (attitude to violence domain), six items relate to preconditions that enable women to  
193 achieve their goal (social independence domain) and three items relate to Women’s participation in  
194 decision making (decision making domain) as indicated in (Table 1). All three measures of  
195 empowerment included all 14 items with different item weights for each empowerment measure.  
196 Standardization of the scores was done using the means and standard deviations for southern Africa.  
197 Each domain of the SWPER index was categorized into three groups as low empowerment, medium

198 empowerment, and high empowerment based on set cut-offs as shown in (Table 2). Full details related  
 199 to the equations used to calculate and standardize the SWPER scores are available online [42] and  
 200 described elsewhere [30].

201 **Table 1: Items used in each domain of the SWPER index and corresponding response codes.**

| ITEM                                                                 | CODE OR UNIT                                                        |
|----------------------------------------------------------------------|---------------------------------------------------------------------|
| <b>Attitude to violence domain</b>                                   |                                                                     |
| 1. Beating justified if wife goes out without telling husband        | Yes = -1; Don't know = 0; No = 1                                    |
| 2. Beating justified if wife neglects the children                   | Yes = -1; Don't know = 0; No = 1                                    |
| 3. Beating justified if wife argues with husband                     | Yes = -1; Don't know = 0; No = 1                                    |
| 4. Beating justified if wife refuses to have sex with husband        | Yes = -1; Don't know = 0; No = 1                                    |
| 5. Beating justified if wife burns the food                          | Yes = -1; Don't know = 0; No = 1                                    |
| <b>Social independence domain</b>                                    |                                                                     |
| 6. Frequency of reading newspaper or magazine                        | Not at all = 0, <once a week = 1, ≥once a week = 2                  |
| 7. Woman education in completed years of schooling                   |                                                                     |
| 8. Age of woman at first birth*                                      | Years                                                               |
| 9. Age at first cohabitation                                         | Years                                                               |
| 10. Age difference: woman's minus husband's age                      | Years                                                               |
| 11. Education difference: woman's minus husband's years of schooling | Years                                                               |
| <b>Decision Making Domain</b>                                        |                                                                     |
| 12. Who usually decides on respondents' health care                  | Husband or other alone = -1; Joint decision or respondent alone = 1 |
| 13. Who usually decides on large household Purchases                 | Husband or other alone = -1; Joint decision or respondent alone = 1 |
| 14. Who usually decides on visits to family or Relatives             | Husband or other alone = -1; Joint decision or respondent alone = 1 |

202 \* This item age at first birth was imputed with age at first cohabitation for those women who had not had a child  
 203

204 **Table 2: Cut-offs used to categorize women's empowerment in each domain of the SWPER index.**

| CATEGORY           | ATTITUDE TO VIOLENCE | SOCIAL INDEPENDENCE | DECISION-MAKING |
|--------------------|----------------------|---------------------|-----------------|
| Low Empowerment    | ≤-0.700              | ≤-0.559             | ≤-1.000         |
| Medium Empowerment | >-0.700 ≤0.400       | >-0.559 ≤0.293      | >-1.000 ≤0.600  |
| High Empowerment   | >0.400               | >0.293              | >0.600          |

205  
 206  
 207  
 208

## 209 Data analysis

210 Data was analyzed using SPSS version 22. Participants' socio-demographic characteristics, HIV testing  
211 rate, and levels of Women empowerment are presented using descriptive statistics. Bivariate analysis  
212 was conducted using the Chi-square test of independence to examine potential candidate variables for  
213 inclusion in logistic regression models. To account for the multistage sampling design used in the survey  
214 and produce estimates that were representative of the country, we employed the complex samples  
215 procedure in SPSS. Firstly, we set up a complex sampling plan using the CSPLAN command and adjusted  
216 for individual weights, clusters (primary sampling unit), and strata following the guidelines of DHS [43]  
217 on handling individual weight variables. Since our study involved a subpopulation of married/partnered  
218 women, we used the variable “current marital status” to specify the subpopulation during the analysis.  
219 We constructed six logistic regression models. Model 1 was a univariable analysis of measures of  
220 women empowerment and socio-demographic factors with the dependent variable (ever tested for  
221 HIV). Variables that were statistically significant at  $p < 0.2$  in model 1 were analyzed simultaneously for  
222 their combined effects in model 2. Thereafter, models 3, 4, and 5 were constructed to assess the  
223 direction of the relationships between measures of empowerment (attitude to violence, social  
224 independence, and decision-making) respectively when considered independently, while adjusting for  
225 confounding socio-demographic variables that were statistically significant at  $p < 0.2$  from model 2.  
226 Finally, we assessed the combined effects of measures of empowerment on HIV by running the  
227 variables simultaneously in model 6 while controlling for confounding socio-demographic factors. The  
228 significance level was considered as  $p < 0.05$ . We present both the AOR and the corresponding 95% CI.

229

## 230 Ethics considerations

231 A formal request for analysis of all data was made to the DHS program, through their website  
232 ([www.dhsprogram.com](http://www.dhsprogram.com)), and permission and access to the data was granted 30<sup>th</sup> November 2023. The  
233 original data was collected with ethical approval from the Tropical Disease and Research Center (TDRC)  
234 and the Research Ethics Review Board of the Center for Disease Control and Prevention (CDC) Atlanta.  
235 The study did not require any formal ethical approval because we used secondary data sources. The  
236 process of collecting data for the Zambia Demographic and Health Survey (ZDHS) necessitated  
237 obtaining consent from individuals aged 18 and above. Before seeking assent from minors, the DHS  
238 protocol mandated obtaining written informed consent from parents or guardians of all participants  
239 under 18 years of age.

240

241

242

243

244

245

246

247

248

249

## 250 Results

251 (Table 3) shows the background characteristics of the studied women. Overall, 5,328  
252 married/partnered women were included in the analysis. The majority of women studied were  
253 between the ages of 20 to 39 years. Only 5.6% were aged below 20 years and 18.8% were aged  
254 between 40 to 49 years. Close to two-thirds (62.8%) were living in rural areas and more than half  
255 (52.2%) had primary education. With regards to wealth, a large proportion (41.6%) of women were  
256 poor, 20.2% were in the middle class and 38.2% were rich. More than two-thirds (85.2%) had no  
257 previous union. There was an almost equal proportion of women who were working and not working  
258 (49.5% and 50.5% respectively). The majority (97.8%) of women had no health insurance coverage.  
259 There was a high (94.9%) HIV testing rate among women.

260

261

262

263

264

265

266

267

268

269

270

271 **Table 3: Socio-demographic Characteristics of Married/partnered Women in Zambia (n=5328)**

| Variable                                  | Frequency (Weighted)<br>n (%) |
|-------------------------------------------|-------------------------------|
| <b>Ever been tested for HIV</b>           |                               |
| Yes                                       | 5057 (94.9)                   |
| No                                        | 271 (5.1)                     |
| <b>Age group</b>                          |                               |
| <20 years                                 | 300 (5.6)                     |
| 20 to 29 years old                        | 2158 (40.5)                   |
| 30 to 39 years old                        | 1871 (35.1)                   |
| 40 to 49 years old                        | 999 (18.8)                    |
| <b>Type of residence</b>                  |                               |
| Rural                                     | 3346 (62.8)                   |
| Urban                                     | 1982 (37.2)                   |
| <b>Level of education</b>                 |                               |
| No education                              | 510 (9.6)                     |
| Primary                                   | 2781 (52.2)                   |
| Secondary or higher                       | 2037 (38.2)                   |
| <b>Wealth</b>                             |                               |
| Poor                                      | 2218 (41.6)                   |
| Middle                                    | 1078 (20.2)                   |
| Rich                                      | 2032 (38.2)                   |
| <b>Number of unions</b>                   |                               |
| Once                                      | 4542 (85.2)                   |
| More than once                            | 786 (14.8)                    |
| <b>Working status</b>                     |                               |
| Working                                   | 2639 (49.5)                   |
| Not working                               | 2689 (50.5)                   |
| <b>Health insurance coverage</b>          |                               |
| Covered                                   | 119 (2.2)                     |
| Not covered                               | 5209 (97.8)                   |
| <b>Given birth in the last five years</b> |                               |
| Yes                                       | 3912 (73.4)                   |
| No                                        | 1416 (26.6)                   |

272

## 273 Associations between socio-demographic characteristics and HIV testing

274 To assess associations between socio-demographic characteristics and the outcome variable (ever  
275 tested for HIV), the Pearson Chi-square test was conducted. (Table 4) presents the results of the  
276 associations. HIV testing did not significantly vary by the number of previous unions a woman had.  
277 However, there were significant variations in HIV testing by age group, place of residence, level of

278 education, wealth quintile, working status, health insurance coverage, and having given birth in the last  
 279 five years preceding the survey.

280 **Table 4: Bivariate association between socio-demographic characteristics and HIV testing among Zambian**  
 281 **married/partnered women (N=5328).**

| Socio-demographic characteristics         | Tested for HIV<br>N=5057<br>n (%) | Never been tested<br>for HIV.<br>N=271<br>n (%) | Chi-Square<br>( $\chi^2$ ) | P-value          |
|-------------------------------------------|-----------------------------------|-------------------------------------------------|----------------------------|------------------|
| <b>Age group</b>                          |                                   |                                                 | 113.3                      | <b>&lt;0.001</b> |
| <20 years                                 | 251 (83.7)                        | 49 (16.3)                                       |                            |                  |
| 20 to 29 years old                        | 2061 (95.5)                       | 96 (4.5)                                        |                            |                  |
| 30 to 39 years old                        | 1820 (97.3)                       | 51 (2.7)                                        |                            |                  |
| 40 to 49 years old                        | 925 (92.5)                        | 75 (7.5)                                        |                            |                  |
| <b>Type of residence</b>                  |                                   |                                                 | 56.1                       | <b>&lt;0.001</b> |
| Rural                                     | 3118 (93.2)                       | 228 (6.8)                                       |                            |                  |
| Urban                                     | 1939 (97.8)                       | 43 (2.2)                                        |                            |                  |
| <b>Level of education</b>                 |                                   |                                                 | 138.4                      | <b>&lt;0.001</b> |
| No education                              | 435 (85.4)                        | 74 (14.6)                                       |                            |                  |
| Primary                                   | 2624 (94.4)                       | 157 (5.6)                                       |                            |                  |
| Secondary or higher                       | 1998 (98.0)                       | 40 (2.0)                                        |                            |                  |
| <b>Wealth</b>                             |                                   |                                                 | 86.9                       | <b>&lt;0.001</b> |
| Poor                                      | 2036 (91.8)                       | 182 (8.2)                                       | 0.2                        |                  |
| Middle                                    | 1029 (95.4)                       | 49 (4.6)                                        |                            |                  |
| Rich                                      | 1992 (98.0)                       | 40 (2.0)                                        |                            |                  |
| <b>Number of unions</b>                   |                                   |                                                 | 0.1                        | 0.781            |
| Once                                      | 4312 (94.9)                       | 229 (5.1)                                       |                            |                  |
| More than once                            | 745 (94.7)                        | 42 (5.3)                                        |                            |                  |
| <b>Working status</b>                     |                                   |                                                 | 6.7                        | <b>0.034</b>     |
| Working                                   | 2573 (95.7)                       | 116 (4.3)                                       |                            |                  |
| Not working                               | 2484 (94.1)                       | 155 (5.9)                                       |                            |                  |
| <b>Health insurance coverage</b>          |                                   |                                                 | 5.2                        | <b>0.006</b>     |
| Covered                                   | 118 (99.4)                        | 1 (0.6)                                         |                            |                  |
| Not covered                               | 4939 (94.8)                       | 270 (5.2)                                       |                            |                  |
| <b>Given birth in the last five years</b> |                                   |                                                 | 52.7                       | <b>&lt;0.001</b> |
| Yes                                       | 3765 (96.2)                       | 148 (3.8)                                       |                            |                  |
| No                                        | 1292 (91.3)                       | 123 (8.7)                                       |                            |                  |

282

283

284

285



## 286 Women empowerment and HIV testing

287 As mentioned in previous sections, women's empowerment was measured using the standardized  
288 SWPER index. Three domains of empowerment were assessed, namely attitude to violence, social  
289 independence, and decision-making. To understand the influence of women empowerment on the  
290 utilization of HIV testing services, we conducted a Pearson Chi-square test between measures of  
291 empowerment and the outcome variable. The results of the analysis are displayed in (Table 5). More  
292 than half of women were highly empowered in the attitude to violence and decision-making domains  
293 of the SWPER index (50.6% and 52.9% respectively). However, a larger proportion (41.5%) of women  
294 had medium levels of empowerment in the social independence domain. HIV testing significantly  
295 varied by levels of empowerment on all three domains of the SWPER index.

296 **Table 5. Women empowerment and HIV testing among Zambian married/partnered women.**

| Women empowerment domain    | Total n (%)<br>N=5328 | Tested for HIV<br>n (%)<br>N=5057 | Chi-Square ( $\chi^2$ ) | P-value          |
|-----------------------------|-----------------------|-----------------------------------|-------------------------|------------------|
| <b>Attitude to violence</b> |                       |                                   | 17.2                    | <b>0.002</b>     |
| Low empowerment             | 1669 (31.3)           | 1553 (93.1)                       |                         |                  |
| Medium empowerment          | 961 (18.1)            | 920 (95.8)                        |                         |                  |
| High empowerment            | 2698 (50.6)           | 2584 (95.8)                       |                         |                  |
| <b>Social independence</b>  |                       |                                   | 62.5                    | <b>&lt;0.001</b> |
| Low empowerment             | 1663 (31.2)           | 1524 (91.6)                       |                         |                  |
| Medium empowerment          | 2208 (41.5)           | 2111 (95.6)                       |                         |                  |
| High empowerment            | 1457 (27.3)           | 1422 (97.6)                       |                         |                  |
| <b>Decision making</b>      |                       |                                   | 62.4                    | <b>&lt;0.001</b> |
| Low empowerment             | 1226 (23.0)           | 1118 (91.0)                       |                         |                  |
| Medium empowerment          | 1286 (24.1)           | 1212 (94.2)                       |                         |                  |
| High empowerment            | 2816 (52.9)           | 2729 (96.9)                       |                         |                  |

297

298

299

300

301

## 302 Predictors of HIV testing among Zambian coupled women

303 Complex samples binary logistic regression analysis was conducted to assess the relationship of the  
304 three measures of women empowerment and of socio-demographic characteristics with HIV testing.  
305 We constructed six models for the univariable and multivariable analysis. Model 1 focused on  
306 univariable analysis, examining the associations of socio-demographic factors and women  
307 empowerment measures with HIV testing individually, to identify candidate variables for inclusion in  
308 multivariable analysis (Table 6). Model 2 involved multivariable analysis, simultaneously adding all  
309 sociodemographic factors that were statistically significant at  $p < 0.2$  in model 1. Models 3 to 5  
310 incorporated the three measures of empowerment individually, each introduced separately into the  
311 analysis while adjusting for socio-demographic factors that were statistically significant at  $p < 0.2$  in  
312 model 2. In Model 3, social independence and decision-making were excluded; in Model 4 attitude to  
313 violence and decision-making were excluded; and in Model 5 we excluded attitude to violence and  
314 social independence. Thus models 3, 4, and 5 addressed attitude to violence, social independence, and  
315 decision-making empowerment variables respectively while controlling for the effects of socio-  
316 demographic factors (Table 7). In model 6, all three empowerment measures were run simultaneously  
317 to determine their combined effects on HIV testing. The model explained 17.3% (Nagelkerke) of the  
318 variance in the dependent variable and correctly classified 94.9% of the cases.

319 When measures of women empowerment were assessed individually in the unadjusted model (model  
320 1), high empowerment was significantly associated with HIV testing. Compared to women with low  
321 empowerment on attitude to violence, those with high empowerment and medium empowerment  
322 were 1.7 times (COR = 1.7; 95% CI: 1.1, 2.6) and 1.7 times (COR = 1.7; 95% CI: 1.7, 2.3) more likely to

323 have been tested for HIV respectively. With regards to the social independence domain, women with  
324 high empowerment and those with medium empowerment were 3.8 times (COR = 3.8; 95% CI: 2.5, 5.8)  
325 and 2.0 times (COR = 2.0; 95% CI: 1.5, 2.7) more likely to have undergone an HIV test compared to  
326 those with low empowerment respectively. Moreover, women who were highly empowered and those  
327 with medium empowerment in decision-making were 3.1 times (COR = 3.1; 95% CI: 2.3, 4.2) and 1.6  
328 times (COR = 1.6; 95% CI: 1.2, 2.2) more likely to have an HIV test done compared to those with low  
329 empowerment (model 1). After adjusting for the effects of other variables as illustrated in Table 5,  
330 women with high empowerment and medium empowerment in attitude to violence and social  
331 independence were no more likely to test for HIV than those with low empowerment (models 3 and 4).  
332 The decision-making domain remained a significant predictor of HIV testing in the adjusted model  
333 (Models 5). Women who were highly empowered in decision-making were 2.0 times more likely to be  
334 tested for HIV than those with low empowerment in decision-making after adjusting for confounding  
335 socio-demographic variables (AOR = 2.0; 95% CI: 1.5, 2.8). However, there was no significant difference  
336 in HIV testing between those with medium and low empowerment in decision-making in the adjusted  
337 model. When considering the combined effects of all measures of empowerment and socio-  
338 demographic factors in model 6, women with high empowerment in decision-making were 2.1 times  
339 more likely to have tested for HIV than those with low empowerment (AOR = 2.1; 95% CI: 1.5, 2.9).  
340 Among socio-demographic characteristics, age category, level of education, wealth, and having given  
341 birth in the last 5 years were the factors significantly associated with HIV testing. The odds of HIV  
342 testing were higher among women aged 20 years or older than those aged below 20 years (AOR = 2.4;  
343 95% CI: 1.6, 3.6 for 20-29 years old versus <20 years old, AOR = 5.3; 95% CI: 3.4, 8.2 for 30-39 years old  
344 versus <20 years old, AOR = 2.9; 95% CI: 1.9, 4.7 for 40-49 years old versus <20 years old). Compared to

345 women with no education, the odds of HIV testing significantly increased with increasing level of  
346 education (AOR = 2.4; 95% CI: 1.7, 3.4 for primary versus no education, AOR = 4.1; 95% CI: 2.3, 7.2 for  
347 secondary or higher versus no education). With regards to wealth, the odds of HIV testing significantly  
348 increased with an increase in the level of wealth (AOR = 1.5; 95% CI: 1.1, 2.2 for middle wealth versus  
349 poor, AOR = 2.4; 95% CI: 1.5, 3.7 for rich versus poor). Moreover, women who gave birth in the last 5  
350 years preceding the survey were significantly more likely to have tested for HIV than those who had not  
351 given birth (AOR = 3.3; 95% CI: 2.5, 4.5).

352

353

354

355

356

357

358

359

360

361

362

363

364 **Table 6. Univariable and multivariable analysis of socio-demographic factors associated with HIV**  
 365 **testing among Zambian married/partnered women.**

| Variables                                 | Model 1 (Univariable analysis) |         | Model 2        |         |
|-------------------------------------------|--------------------------------|---------|----------------|---------|
|                                           | COR (95% CI)                   | P value | AOR (95% CI)   | P value |
| <b>Age group</b>                          |                                |         |                |         |
| <20 years (ref)                           | 1.0                            |         | 1.0            |         |
| 20 to 29 years                            | 2.7 (1.8-4.0)                  | <0.001  | 2.4 (1.6-3.7)  | <0.001  |
| 30 to 39 years                            | 6.1 (3.9-9.5)                  | <0.001  | 6.9 (4.6-10.4) | <0.001  |
| 40 to 49 years                            | 3.6 (2.3-5.6)                  | <0.001  | 5.1 (3.7-7.2)  | <0.001  |
| <b>Level of education</b>                 |                                |         |                |         |
| No education (ref)                        | 1.0                            |         | 1.0            |         |
| Primary                                   | 2.8 (2.0-4.0)                  | <0.001  | 2.8 (2.0-3.9)  | <0.001  |
| Secondary or higher                       | 8.6 (5.2-14.0)                 | <0.001  | 5.9 (3.5-9.9)  | <0.001  |
| <b>Wealth</b>                             |                                |         |                |         |
| Poor (ref)                                | 1.0                            |         | 1.0            |         |
| Middle                                    | 1.9 (1.4-2.6)                  | <0.001  | 1.5 (1.1-2.2)  | 0.006   |
| Rich                                      | 4.5 (2.9-7.0)                  | <0.001  | 2.4 (1.4-4.0)  | <0.001  |
| <b>Working status</b>                     |                                |         |                |         |
| Not working (ref)                         | 1.0                            |         | 1.0            |         |
| Working                                   | 1.4 (1.0-1.9)                  | 0.034   | 1.2 (0.9-1.6)  | 0.159   |
| <b>Number of unions</b>                   |                                |         |                |         |
| Once (ref)                                | 1.0                            |         | -              | -       |
| More than once                            | 1.1 (0.7-1.5)                  | 0.781   | -              | -       |
| <b>Health insurance coverage</b>          |                                |         |                |         |
| Not covered (ref)                         | 1.0                            |         | 1.0            |         |
| Covered                                   | 9.7 (1.3-70.7)                 | 0.026   | 2.1 (0.3-16.8) | 0.491   |
| <b>Type of residence</b>                  |                                |         |                |         |
| Rural (ref)                               | 1.0                            |         | 1.0            |         |
| Urban                                     | 3.3 (2.2-5.0)                  | <0.001  | 0.8 (0.5-1.4)  | 0.476   |
| <b>Given birth in the last five years</b> |                                |         |                |         |
| No (ref)                                  | 1.0                            |         | 1.0            |         |
| Yes                                       | 2.4 (1.8-3.3)                  | <0.001  | 3.2 (2.4-4.4)  | <0.001  |
| <b>Attitude to violence</b>               |                                |         |                |         |
| Low empowerment (ref)                     | 1.0                            |         |                |         |
| Medium empowerment                        | 1.7 (1.1-2.6)                  | 0.022   | -              | -       |
| High empowerment                          | 1.7 (1.2-2.3)                  | 0.001   | -              | -       |
| <b>Social independence</b>                |                                |         |                |         |
| Low empowerment (ref)                     | 1.0                            |         |                |         |
| Medium empowerment                        | 2.0 (1.5-2.7)                  | <0.001  | -              | -       |
| High empowerment                          | 3.8 (2.5-5.8)                  | <0.001  | -              | -       |
| <b>Decision making</b>                    |                                |         |                |         |
| Low empowerment (ref)                     | 1.0                            |         |                |         |
| Medium empowerment                        | 1.6 (1.2-2.2)                  | 0.004   | -              | -       |
| High empowerment                          | 3.1 (2.3-4.2)                  | <0.001  | -              | -       |

366 COR-Crude Odds Ratio, AOR-Adjusted Odds Ratio

367

368 **Table 7. Associations between measures of women empowerment and HIV testing among Zambian**  
 369 **married/partnered women.**

| Variables                                 | Model 3        |         | Model 4       |         | Model 5       |         | Model 6       |         |
|-------------------------------------------|----------------|---------|---------------|---------|---------------|---------|---------------|---------|
|                                           | AOR (95% CI)   | P value | AOR (95% CI)  | P value | AOR (95% CI)  | P value | AOR (95% CI)  | P value |
| <b>Attitude to violence</b>               |                |         |               |         |               |         |               |         |
| Low empowerment (ref)                     | 1.0            |         | -             | -       | -             | -       | 1.0           |         |
| Medium empowerment                        | 1.3 (0.8-2.0)  | 0.245   | -             | -       | -             | -       | 1.4 (0.9-1.8) | 0.169   |
| High empowerment                          | 1.2 (0.9-1.7)  | 0.165   | -             | -       | -             | -       | 1.2 (0.9-1.6) | 0.277   |
| <b>Social independence</b>                |                |         |               |         |               |         |               |         |
| Low empowerment (ref)                     | -              | -       | 1.0           |         | -             | -       | 1.0           |         |
| Medium empowerment                        | -              | -       | 1.2 (0.9-1.6) | 0.218   | -             | -       | 1.3 (0.9-1.8) | 0.068   |
| High empowerment                          | -              | -       | 1.5 (0.9-2.4) | 0.146   | -             | -       | 1.6 (0.9-2.7) | 0.096   |
| <b>Decision making</b>                    |                |         |               |         |               |         |               |         |
| Low empowerment (ref)                     | -              | -       | -             | -       | 1.0           |         | 1.0           |         |
| Medium empowerment                        | -              | -       | -             | -       | 1.4 (0.9-1.9) | 0.053   | 1.4 (0.9-1.9) | 0.067   |
| High empowerment                          | -              | -       | -             | -       | 2.0 (1.5-2.8) | <0.001  | 2.1 (1.5-2.9) | <0.001  |
| <b>Age group</b>                          |                |         |               |         |               |         |               |         |
| <20 years (ref)                           | 1.0            |         | 1.0           |         | 1.0           |         | 1.0           |         |
| 20 to 29 years                            | 2.7 (1.8-4.0)  | <0.001  | 2.6 (1.7-3.9) | <0.001  | 2.6 (1.7-3.9) | <0.001  | 2.4 (1.6-3.6) | <0.001  |
| 30 to 39 years                            | 6.1 (3.9-9.5)  | <0.001  | 5.8 (3.7-9.1) | <0.001  | 5.8 (3.7-8.9) | <0.001  | 5.3 (3.4-8.2) | <0.001  |
| 40 to 49 years                            | 3.6 (2.3-5.6)  | <0.001  | 3.3 (2.1-5.3) | <0.001  | 3.4 (2.2-5.2) | <0.001  | 2.9 (1.9-4.7) | <0.001  |
| <b>Level of education</b>                 |                |         |               |         |               |         |               |         |
| No education (ref)                        | 1.0            |         | 1.0           |         | 1.0           |         |               |         |
| Primary                                   | 2.8 (2.0-3.9)  | <0.001  | 2.6 (1.9-3.7) | <0.001  | 2.6 (1.9-3.7) | <0.001  | 2.4 (1.7-3.4) | <0.001  |
| Secondary or higher                       | 5.9 (3.6-10.0) | <0.001  | 4.9 (2.9-8.7) | <0.001  | 5.3 (3.1-9.0) | <0.001  | 4.1 (2.3-7.2) | <0.001  |
| <b>Wealth</b>                             |                |         |               |         |               |         |               |         |
| Poor (ref)                                | 1.0            |         | 1.0           |         | 1.0           |         | 1.0           |         |
| Middle                                    | 1.5 (1.1-2.2)  | 0.009   | 1.6 (1.1-2.3) | 0.006   | 1.5 (1.1-2.2) | 0.012   | 1.5 (1.1-2.2) | 0.012   |
| Rich                                      | 2.6 (1.7-4.1)  | <0.001  | 2.7 (1.7-4.3) | <0.001  | 2.4 (1.5-3.9) | <0.001  | 2.4 (1.5-3.7) | <0.001  |
| <b>Working status</b>                     |                |         |               |         |               |         |               |         |
| Not working (ref)                         | 1.0            |         | 1.0           |         | 1.0           |         | -             | -       |
| Working                                   | 1.2 (0.9-1.7)  | 0.140   | 1.2 (0.9-1.6) | 0.156   | 1.2 (0.9-1.6) | 0.200   | -             | -       |
| <b>Given birth in the last five years</b> |                |         |               |         |               |         |               |         |
| No (ref)                                  | 1.0            |         | 1.0           |         | 1.0           |         | 1.0           |         |
| Yes                                       | 3.3 (2.4-4.4)  | <0.001  | 3.2 (2.4-4.4) | <0.001  | 3.4 (2.5-4.6) | <0.001  | 3.3 (2.5-4.5) | <0.001  |

370 AOR-Adjusted odds ratio

371

372

373

374

375

## 376 Discussion

377 A woman's ability to undergo HIV testing is significantly influenced by her level of empowerment. It is  
378 presumed that an empowered woman, whether through cultural, political, or professional means,  
379 possesses the confidence to independently choose to undergo HIV testing [15]. This autonomy ensures  
380 that she is not reliant on her husband or partner to make decisions regarding whether to undergo HIV  
381 testing. In Zambia, the cultural expectation of men's dominance and women's subordination has  
382 resulted in limited access to healthcare among women and reduced their autonomy to make  
383 independent decisions regarding their health [13,14,23]. Regardless, the influence of women  
384 empowerment on HIV testing has not been studied in Zambia. This study therefore examined the  
385 association between women empowerment and HIV testing among married and partnered women in  
386 Zambia using the nationally representative Zambia demographic and health survey 2018 data. Three  
387 domains of women empowerment (attitude to violence, social independence, and decision-making)  
388 were measured using the novel, globally validated SWPER index. HIV testing among married and  
389 partnered women in Zambia was found to be encouragingly high, as 94.9% of women had undergone  
390 an HIV test. In Zambia, women are tested for HIV when pregnant during antenatal care attendance as  
391 part of HIV prevention, treatment, and care strategy [44]. This could explain the high HIV testing rate  
392 observed in this study. Delaying the detection of HIV and remaining uninformed about one's positive  
393 status entails various adverse consequences. Unawareness of HIV positivity raises the risk of  
394 transmitting the virus to others, including mother-to-child transmission for pregnant women [45,46].  
395 Additionally, late diagnosis can diminish the life expectancy of an infected person by elevating the viral  
396 load and diminishing the body's CD4+ T-cell count [47]. Timely identification of HIV is crucial to ensure

397 that those with the infection receive appropriate treatment and care, thereby restricting the  
398 transmission of the virus to others [48].

399 The majority of women had higher levels of empowerment in decision-making and attitude to violence  
400 and lower levels of empowerment in social independence. This study found that women's  
401 empowerment influenced HIV testing. Women who were highly empowered in attitude to violence,  
402 social independence, and decision-making were significantly more likely to have undergone an HIV test  
403 compared to those with medium or low empowerment in the unadjusted analysis. Moreover, decision-  
404 making was the strongest predictor of HIV testing. Women who were highly empowered in decision-  
405 making had higher odds of having tested for HIV compared to those with low empowerment, even  
406 after controlling for the effects of other variables in the adjusted model. These results are consistent  
407 with findings from a pooled analysis of 31 sub-Saharan African countries that assessed the association  
408 between HIV testing and the decision-making domain of the SWPER index [49]. However, attitude to  
409 violence and social independence domains had no significant associations with HIV testing after  
410 controlling for the effects of other variables in the adjusted model. The diminished significance of  
411 associations with HIV testing after adjusting for the effects of other variables may be attributed to a  
412 potential confounding factor. It is plausible that the higher proportion of women in our study who had  
413 given birth in the last 5 years could have influenced the results. In Zambia, HIV testing is done routinely  
414 during pregnancy as part of services offered during antenatal care attendance, and this might have  
415 played a role in shaping women's decision to test for HIV. This highlights the need to consider such  
416 contextual factors in the interpretation of the findings. Moreover, previous studies have reported mixed  
417 results on the relationship between partner violence and HIV testing, with some studies reporting  
418 negative associations [50–56], some reporting positive associations [57–60], and others finding no



419 associations [61–66]. The observed differences in findings may stem from variations in study  
420 populations, contexts, and methodological approaches used in these studies. Our study, however, used  
421 a nationally representative sample of married and partnered women in Zambia and measured women’s  
422 empowerment using a globally validated tool, thereby contributing valuable insights to the body of  
423 existing literature.

424 Finally, among socio-demographic factors studied, age category, level of education, wealth quintile, and  
425 having given birth in the last 5 years were significantly associated with HIV testing across all models.

426 Regarding age category, women who were aged 20 years or more had higher odds of testing for HIV  
427 compared to those younger than 20 years. Similar results have been reported in prior studies [49,67–  
428 69]. A possible explanation for this consistent finding could be attributed to the fact that this age group  
429 is less likely to have gone through pregnancy compared to older age categories, hence they may have  
430 had fewer opportunities to encounter HIV testing through routine antenatal care, resulting in lower  
431 overall odds of testing for HIV within this age group. In many African settings, routine HIV testing is  
432 commonly integrated into antenatal care services for pregnant women.

433 Women with primary education and those with secondary education or higher were consistently more  
434 likely to test for HIV compared to those with no education across all models. This finding was consistent  
435 with studies conducted in Ethiopia [70,71], Nigeria [72], and in Tanzania [73]. Women with some form  
436 of education are more likely to be aware of the importance of HIV testing. They may also have a greater  
437 understanding of the risks associated with HIV and the benefits of early detection. Moreover,  
438 educational attainment is linked to socioeconomic status, and individuals with higher socioeconomic  
439 status may face fewer barriers, such as financial constraints or lack of awareness, that could impede

440 access to HIV testing [74]. Enabling Zambian women to attend at least primary education would aid in  
441 improving HIV testing uptake.

442 Additionally, wealth was an independent predictor of HIV testing. Rich women and those in the middle  
443 wealth quintile had higher odds of testing for HIV compared to poor women. This is supported by  
444 different studies in Tanzania [15], and in the Gambia [69]. Giving birth in the last 5 years preceding the  
445 survey remained significantly associated with HIV testing, even after controlling for the effects of other  
446 variables. Similar results were reported in another similar study among Tanzanian women [15]. These  
447 results could be attributed to the fact that antenatal care services integrate various health  
448 interventions, including HIV testing, to provide comprehensive care to pregnant women. As a result,  
449 women who gave birth in the last 5 years were more likely to have undergone HIV testing as part of  
450 routine antenatal care, leading to higher odds of HIV testing in this demographic group.

## 451 **Strengths and limitations of the study**

452 The large sample size in this study enhanced the statistical robustness of this investigation.  
453 Furthermore, the utilization of weight application and complex samples plan during analysis addressed  
454 potential biases and considerations associated with the DHS sampling design, resulting in unbiased  
455 national estimates. However, this study recognizes some limitations. Firstly, we could not infer causality  
456 due to the cross-sectional design of the study. Secondly, the analysis involved only married and  
457 partnered women because questions of the SWPER index are addressed to this category of women.  
458 Hence, results cannot be generalized to the broader category of Zambian women. Furthermore,  
459 participants were asked about events that occurred in the past (ever tested for HIV), with the possibility

460 of recall bias. The findings from this study should, therefore, be interpreted within the context of these  
461 limitations.

462

## 463 Conclusion

464 This study sheds light on the critical influence of women's empowerment on HIV testing among  
465 married and partnered women in Zambia. While overall HIV testing rates were high, empowered  
466 women, particularly those highly empowered in decision-making, were more likely to have undergone  
467 HIV testing. The study emphasizes the influence of contextual factors, such as routine antenatal care  
468 testing during pregnancy, on HIV testing patterns. Moreover, socio-demographic factors, including age,  
469 education, wealth, and recent childbirth, were identified as significant predictors of HIV testing.

470

471

## 472 Acknowledgments

473 The authors express gratitude to the DHS program for providing the data used in the analysis.

474

475

476

477

478

479

## 480 References

- 481 1. UNAIDS. Global HIV & AIDS Statistics. 2023.
- 482 2. Woolfork MN, Fox A, Swartzendruber A, Rathbun S, Lee J, Mutanga JN, et al. Empowerment and  
483 HIV Risk Behaviors in Couples: Modeling the Theory of Gender and Power in an African Context.  
484 *Women's Health Reports*. 2020;1: 89–101. doi:10.1089/whr.2019.0020
- 485 3. Amin A. Addressing gender inequalities to improve the sexual and reproductive health and  
486 wellbeing of women living with HIV. *Journal of the International AIDS Society*. International AIDS  
487 Society; 2015. doi:10.7448/IAS.18.6.20302
- 488 4. Kishor S, Subaiya L. DHS COMPARATIVE REPORTS 20 Understanding Women's empowErment: a  
489 Comparative analysis of demographiC and health sUrveys (dhs) data. 2008. Available:  
490 [www.measuredhs.com](http://www.measuredhs.com)
- 491 5. Madiba S, Ngwenya N. Cultural practices, gender inequality and inconsistent condom use increase  
492 vulnerability to HIV infection: narratives from married and cohabiting women in rural  
493 communities in Mpumalanga province, South Africa. *Glob Health Action*. 2017;10.  
494 doi:10.1080/16549716.2017.1341597
- 495 6. Mtenga SM, Pfeiffer C, Merten S, Mamdani M, Exavery A, Haafkens J, et al. Prevalence and social  
496 drivers of HIV among married and cohabitating heterosexual adults in south-eastern Tanzania:  
497 Analysis of adult health community cohort data. *Glob Health Action*. 2015;8.  
498 doi:10.3402/gha.v8.28941
- 499 7. Hugonnet S, Mosha F, Todd J, Mugeye. Kokugonza. Incidence of HIV infection in stable sexual  
500 partnerships: a retrospective cohort study of 1802 couples in Mwanza Region, Tanzania. *National*  
501 *Library of Medicine*. 2002.
- 502 8. Malamba SS, Mermin JH, Bunnell R, Mubangizi J, Kalule J, Marum E, et al. Couples at Risk HIV-1  
503 Concordance and Discordance Among Sexual Partners Receiving Voluntary Counseling and Testing  
504 in Uganda. *EPIDEMIOLOGY AND SOCIAL SCIENCE*. 2005. Available: <http://journals.lww.com/jaids>
- 505 9. Biraro S, Ruzagira E, Kamali A, Whitworth J, Grosskurth H, Weiss HA. HIV-1 Transmission within  
506 Marriage in Rural Uganda: A Longitudinal Study. *PLoS One*. 2013;8.  
507 doi:10.1371/journal.pone.0055060
- 508 10. Alkire S, Meinzen-Dick R, Peterman A, Quisumbing A, Seymour G, Vaz A. The Women's  
509 Empowerment in Agriculture Index. *World Development*. 2013;52: 71–91.  
510 doi:10.1016/J.WORLDDEV.2013.06.007
- 511 11. Greig A, Peacock D, Jewkes R, Msimang S. Gender and AIDS: time to act. *AIDS (London, England)*.  
512 2008;22 Suppl 2. doi:10.1097/01.aids.0000327435.28538.18
- 513 12. Ghanotakis E, Peacock D, Wilcher R. The importance of addressing gender inequality in efforts to  
514 end vertical transmission of HIV. *Journal of the International AIDS Society*. 2012;15.  
515 doi:10.7448/IAS.15.4.17385

- 516 13. Butts SA, Parmley LE, Alcaide ML, Rodriguez VJ, Kayukwa A, Chitalu N, et al. Let us fight and  
517 support one another: Adolescent girls and young women on contributors and solutions to HIV risk  
518 in Zambia. *International Journal of Women's Health*. 2017;9: 727–737. doi:10.2147/IJWH.S142232
- 519 14. UNAIDS. THE GAP REPORT. 2014.
- 520 15. Bashemera DR, Nhembo MJ, Benedict G. The Role of Women's Empowerment in Influencing HIV  
521 Testing [WP101]. 2013.
- 522 16. ZDHS. 2018 Zambia Demographic and Health Survey. 2018. Available: [www.zamstats.gov.zm](http://www.zamstats.gov.zm)
- 523 17. Chisenga T, Chihana M, Chishimba P, Chitembo L, Mulenga L, Silumesii A, et al. Maintaining HIV  
524 testing and treatment services in Zambia during COVID-19: a story of success and resilience.  
525 *Global Health Action*. 2023;16. doi:10.1080/16549716.2023.2175992
- 526 18. Kelley AL, Karita E, Sullivan PS, Katangulia F, Chomba E, Carael M, et al. Knowledge and  
527 Perceptions of Couples' Voluntary Counseling and Testing in Urban Rwanda and Zambia: A Cross-  
528 Sectional Household Survey. *PLOS ONE*. 2011;6: e19573. doi:10.1371/JOURNAL.PONE.0019573
- 529 19. Fylkesnes K, Siziya S. A randomized trial on acceptability of voluntary HIV counselling and testing.  
530 *Tropical Medicine and International Health*. 2004. pp. 566–572. doi:10.1111/j.1365-  
531 3156.2004.01231.x
- 532 20. Gari S, Malungo JRS, Martin-Hilber A, Musheke M, Schindler C, Merten S. HIV Testing and  
533 Tolerance to Gender Based Violence: A Cross-Sectional Study in Zambia. *PLOS ONE*. 2013;8:  
534 e71922. doi:10.1371/JOURNAL.PONE.0071922
- 535 21. Merten S, Ntalasha H, Musheke M. Non-Uptake of HIV Testing in Children at Risk in Two Urban  
536 and Rural Settings in Zambia: A Mixed-Methods Study. *PLOS ONE*. 2016;11: e0155510.  
537 doi:10.1371/JOURNAL.PONE.0155510
- 538 22. Musheke M, Merten S, Bond V. Why do marital partners of people living with HIV not test for HIV?  
539 A qualitative study in Lusaka, Zambia. *BMC Public Health*. 2016;16: 1–13. doi:10.1186/S12889-  
540 016-3396-Z/FIGURES/1
- 541 23. UN WOMEN. REPUBLIC OF ZAMBIA Progress Report on the Implementation of the Beijing  
542 Declaration and Platform for Action. 2019. Available: [www.gender.gov.zm](http://www.gender.gov.zm)
- 543 24. UN WOMEN. REPUBLIC OF ZAMBIA Progress Report on the Implementation of the Beijing  
544 Declaration and Platform for Action. 2019. Available: [www.gender.gov.zm](http://www.gender.gov.zm)
- 545 25. UNDP. 2023 Gender Social Norms Index. 2023.
- 546 26. Asaolu IO, Alaofè H, Gunn JKL, Adu AK, Monroy AJ, Ehiri JE, et al. Measuring women's  
547 empowerment in Sub-Saharan Africa: Exploratory and Confirmatory Factor Analyses of the  
548 demographic and health surveys. *Frontiers in Psychology*. 2018;9. doi:10.3389/fpsyg.2018.00994
- 549 27. Heckert J, Fabic MS. Improving Data Concerning Women's Empowerment in Sub-Saharan Africa.  
550 *Family Planning*. 2013. Available: <https://www.jstor.org/stable/23654761>

- 551 28. Bishop D, Bowman K. Still learning: a critical reflection on three years of measuring women’s  
552 empowerment in Oxfam. *Gender and Development*. 2014;22: 253–269.  
553 doi:10.1080/13552074.2014.920993
- 554 29. Ewerling F, Lynch JW, Victora CG, van Eerdewijk A, Tysler M, Barros AJD. The SWPER index for  
555 women’s empowerment in Africa: development and validation of an index based on survey data.  
556 *The Lancet Global Health*. 2017;5: e916–e923. doi:10.1016/S2214-109X(17)30292-9
- 557 30. Ewerling F, Raj A, Victora CG, Hellwig F, Coll CV, Barros AJ. SWPER Global: A survey-based  
558 women’s empowerment index expanded from Africa to all low- and middle-income countries.  
559 *Journal of Global Health*. 2020;10. doi:10.7189/JOGH.10.020434
- 560 31. ZamStats. 2022 CENSUS OF POPULATION AND HOUSING PRELIMINARY REPORT REPUBLIC OF  
561 ZAMBIA. 2022. Available: [www.zamstats.gov.zm](http://www.zamstats.gov.zm)
- 562 32. Higgins JA, Hoffman S, Dworkin SL. Rethinking gender, heterosexual men, and women’s  
563 vulnerability to HIV/AIDS. *American Journal of Public Health*. 2010. pp. 435–445.  
564 doi:10.2105/AJPH.2009.159723
- 565 33. UNICEF. HIV/AIDS | UNICEF Zambia. 2023 [cited 18 Sep 2023]. Available:  
566 <https://www.unicef.org/zambia/hiv aids>
- 567 34. Wathuta J. Gender inequality dynamics in the prevention of a heterosexual HIV epidemic in sub-  
568 Saharan Africa. <http://dx.doi.org/102989/1608590620161150310>. 2016;15: 55–66.  
569 doi:10.2989/16085906.2016.1150310
- 570 35. Singh SK, Vishwakarma D, Sharma B, Sharma SK. Inequalities in women’s empowerment and  
571 prevalence of HIV in India. *International Journal Of Community Medicine And Public Health*.  
572 2020;7: 3069. doi:10.18203/2394-6040.ijcmph20203380
- 573 36. Richardson ET, Collins SE, Kung T, Jones JH, Tram KH, Boggiano VL, et al. Gender inequality and  
574 HIV transmission: A global analysis. *Journal of the International AIDS Society*. 2014;17.  
575 doi:10.7448/IAS.17.1.19035
- 576 37. Zambia Surpasses UNAIDS HIV Treatment and Viral Suppression Targets and On Track to Surpass  
577 HIV Status Awareness - U.S. Embassy in Zambia. [cited 8 Dec 2023]. Available:  
578 [https://zm.usembassy.gov/zambia-surpasses-un aids-hiv-treatment-and-viral-suppression-targets-](https://zm.usembassy.gov/zambia-surpasses-un aids-hiv-treatment-and-viral-suppression-targets-and-on-track-to-surpass-hiv-status-awareness/)  
579 [and-on-track-to-surpass-hiv-status-awareness/](https://zm.usembassy.gov/zambia-surpasses-un aids-hiv-treatment-and-viral-suppression-targets-and-on-track-to-surpass-hiv-status-awareness/)
- 580 38. Makasa M, Fylkesnes K, Sandøy IF. Risk factors, healthcare-seeking and sexual behaviour among  
581 patients with genital ulcers in Zambia. *BMC Public Health*. 2012;12. doi:10.1186/1471-2458-12-  
582 407
- 583 39. Show KL, Shewade HD, Kyaw KWY, Wai KT, Hone S, Oo HN. HIV testing among general population  
584 with sexually transmitted infection: Findings from myanmar demographic and health survey  
585 (2015-16). *Journal of Epidemiology and Global Health*. Atlantis Press International; 2020. pp. 82–  
586 85. doi:10.2991/JEGH.K.191206.002

- 587 40. Worku Dagne G, Belachew Asresie M, Abeje Fekadu G. Factors associated with sexually  
588 transmitted infections among sexually active men in Ethiopia. Further analysis of 2016 Ethiopian  
589 demographic and health survey data. PLoS ONE. 2020;15. doi:10.1371/journal.pone.0232793
- 590 41. Huda MN, Ahmed MU, Uddin MB, Hasan MK, Uddin J, Dune TM. Prevalence and Demographic,  
591 Socioeconomic, and Behavioral Risk Factors of Self-Reported Symptoms of Sexually Transmitted  
592 Infections (STIs) among Ever-Married Women: Evidence from Nationally Representative Surveys in  
593 Bangladesh. International Journal of Environmental Research and Public Health. 2022;19.  
594 doi:10.3390/ijerph19031906
- 595 42. A survey-based women's empowerment index to be used in all low-and middle-income country  
596 surveys: the SWPER goes global How to calculate the SWPER for a specific survey. 2020 [cited 7  
597 Dec 2023]. Available:  
598 <https://www.dropbox.com/sh/cw6e2th24l4ausa/AAC792VQx3CL7CuIdLwTxKiWa?dl=0>
- 599 43. DHS. Guide to DHS Statistics DHS-7. 2023 [cited 9 Nov 2023]. Available:  
600 [https://dhsprogram.com/data/Guide-to-DHS-Statistics/Analyzing\\_DHS\\_Data.htm](https://dhsprogram.com/data/Guide-to-DHS-Statistics/Analyzing_DHS_Data.htm)
- 601 44. Musheke M, Bond V, Merten S. Couple experiences of provider-initiated couple HIV testing in an  
602 antenatal clinic in Lusaka, Zambia: Lessons for policy and practice. BMC Health Serv Res. 2013;13.  
603 doi:10.1186/1472-6963-13-97
- 604 45. Park BJ, Wannemuehler KA, Marston BJ, Govender N, Pappas PG, Chiller TM. Estimation of the  
605 current global burden of cryptococcal meningitis among persons living with HIV/AIDS. AIDS  
606 (London, England). 2009;23: 525–530. doi:10.1097/QAD.0B013E328322FFAC
- 607 46. Farquhar C, Kiarie JN, Richardson BA, Kabura MN, John FN, Nduati RW, et al. Antenatal Couple  
608 Counseling Increases Uptake of Interventions to Prevent HIV-1 Transmission. Journal of Acquired  
609 Immune Deficiency Syndromes (1999). 2004;37: 1620. doi:10.1097/00126334-200412150-00016
- 610 47. Smurzynski M, Wu K, Benson CA, Bosch RJ, Collier AC, Koletar SL. Relationship between CD4+ T-  
611 cell counts/HIV-1 RNA plasma viral load and AIDS defining events among persons followed in the  
612 ACTG Longitudinal Linked Randomized Trials (ALLRT) study. Journal of acquired immune deficiency  
613 syndromes (1999). 2010;55: 117. doi:10.1097/QAI.0B013E3181E8C129
- 614 48. Granich RM, Gilks CF, Dye C, De Cock KM, Williams BG. Universal voluntary HIV testing with  
615 immediate antiretroviral therapy as a strategy for elimination of HIV transmission: a mathematical  
616 model. Lancet (London, England). 2009;373: 48–57. doi:10.1016/S0140-6736(08)61697-9
- 617 49. Schierl T, Tanaka LF, Klug SJ, Winkler AS, Stelzle D. The Association of Women's Empowerment  
618 with HIV-Related Indicators: A Pooled Analysis of Demographic and Health Surveys in Sub-Saharan  
619 Africa. Journal of Epidemiology and Global Health. 2023;13: 816–824. doi:10.1007/S44197-023-  
620 00153-W/FIGURES/2
- 621 50. Etudo O, Metheny N, Stephenson R, Kalokhe AS. Intimate partner violence is linked to less HIV  
622 testing uptake among high-risk, HIV-negative women in Atlanta. AIDS Care. 2017;29: 953–956.  
623 doi:10.1080/09540121.2016.1271936

- 624 51. Loeliger KB, Marcus R, Wickersham JA, Pillai V, Kamarulzaman A, Altice FL. The Syndemic of HIV,  
625 HIV-related Risk and Multiple Co-morbidities Among Women Who Use Drugs in Malaysia:  
626 Important Targets for Intervention. *Addictive behaviors*. 2016;53: 31.  
627 doi:10.1016/J.ADDBEH.2015.09.013
- 628 52. Mohammed BH, Johnston JM, Harwell JI, Yi H, Tsang KWK, Haidar JA. Intimate partner violence  
629 and utilization of maternal health care services in Addis Ababa, Ethiopia. *BMC Health Services  
630 Research*. 2017;17. doi:10.1186/S12913-017-2121-7
- 631 53. Dude AM. Spousal intimate partner violence is associated with HIV and other STIs among married  
632 rwandan women. *AIDS and Behavior*. 2011;15: 142–152. doi:10.1007/S10461-009-9526-1
- 633 54. Dunkle KL, Decker MR. Gender-Based Violence and HIV: Reviewing the Evidence for Links and  
634 Causal Pathways in the General Population and High-risk Groups. *American Journal of  
635 Reproductive Immunology*. 2013;69: 20–26. doi:10.1111/AJI.12039
- 636 55. Rigby SW, Johnson LF. The relationship between intimate partner violence and HIV: A model-  
637 based evaluation. *Infectious Disease Modelling*. 2017;2: 71–89. doi:10.1016/J.IDM.2017.02.002
- 638 56. Li Y, Marshall CM, Rees HC, Nunez A, Ezeanolue EE, Ehris JE. Intimate partner violence and HIV  
639 infection among women: a systematic review and meta-analysis. *Journal of the International AIDS  
640 Society*. 2014;17. doi:10.7448/IAS.17.1.18845
- 641 57. McCall-Hosenfeld JS, Chuang CH, Weisman CS. Prospective association of intimate partner  
642 violence with receipt of clinical preventive services in women of reproductive age. *Women’s  
643 health issues : official publication of the Jacobs Institute of Women’s Health*. 2013;23.  
644 doi:10.1016/J.WHI.2012.12.006
- 645 58. Brown MJ, Weitzen S, Lapane KL. Association between intimate partner violence and preventive  
646 screening among women. *Journal of women’s health (2002)*. 2013;22: 947–952.  
647 doi:10.1089/JWH.2012.4222
- 648 59. Rountree MA, Chen L, Bagwell M. HIV-Testing Rates and Testing Locations Among Women Who  
649 Have Experienced Intimate Partner Violence: Data From the Centers for Disease Control  
650 Behavioral Risk Factor Surveillance System, 2006. *Violence against women*. 2016;22: 399–414.  
651 doi:10.1177/1077801215603487
- 652 60. Tucker JS, Wenzel SL, Elliott MN, Hambarsoomian K, Golinelli D. Patterns and correlates of HIV  
653 testing among sheltered and low-income housed women in Los Angeles County. *Journal of  
654 acquired immune deficiency syndromes (1999)*. 2003;34: 415–422. doi:10.1097/00126334-  
655 200312010-00009
- 656 61. Nelson KA, Ferrance JL, Masho SW. Intimate partner violence, consenting to HIV testing and HIV  
657 status among Zambian women. *International journal of STD & AIDS*. 2016;27: 832–839.  
658 doi:10.1177/0956462415596299
- 659 62. Satyanarayana VA, Chandra PS, Vaddiparti K, Benegal V, Cottler LB. Factors influencing consent to  
660 HIV testing among wives of heavy drinkers in an urban slum in India. *AIDS care*. 2009;21: 615–621.  
661 doi:10.1080/09540120802385603



- 662 63. Nikolova SP, Small E, Mengo C. Components of resilience in gender: a comparative analysis of HIV  
663 outcomes in Kenya. *International journal of STD & AIDS*. 2015;26: 483–495.  
664 doi:10.1177/0956462414545796
- 665 64. Kiarie JN, Farquhar C, Richardson BA, Kabura MN, John FN, Nduati RW, et al. Domestic violence  
666 and prevention of mother-to-child transmission of HIV-1. *AIDS (London, England)*. 2006;20: 1763–  
667 1769. doi:10.1097/01.AIDS.0000242823.51754.0C
- 668 65. Lyons CE, Grosso A, Drame FM, Ketende S, Diouf D, Ba I, et al. Physical and Sexual Violence  
669 Affecting Female Sex Workers in Abidjan, Côte d’Ivoire: Prevalence, and the Relationship with the  
670 Work Environment, HIV, and Access to Health Services. *Journal of acquired immune deficiency  
671 syndromes (1999)*. 2017;75: 9–17. doi:10.1097/QAI.0000000000001310
- 672 66. Leddy AM, Weiss E, Yam E, Pulerwitz J. Gender-based violence and engagement in biomedical HIV  
673 prevention, care and treatment: a scoping review. *BMC Public Health*. 2019;19.  
674 doi:10.1186/S12889-019-7192-4
- 675 67. Awopegba OE, Kalu A, Ahinkorah BO, Seidu AA, Ajayi AI. Prenatal care coverage and correlates of  
676 HIV testing in sub-Saharan Africa: Insight from demographic and health surveys of 16 countries.  
677 *PLOS ONE*. 2020;15: e0242001. doi:10.1371/JOURNAL.PONE.0242001
- 678 68. Worku MG, Tesema GA, Teshale AB. Prevalence and associated factors of HIV testing among  
679 reproductive-age women in eastern Africa: multilevel analysis of demographic and health surveys.  
680 *BMC public health*. 2021;21. doi:10.1186/S12889-021-11292-9
- 681 69. Deynu M, Agyemang K, Anokye N. Factors Associated with HIV Testing among Reproductive  
682 Women Aged 15–49 Years in the Gambia: Analysis of the 2019–2020 Gambian Demographic and  
683 Health Survey. *International Journal of Environmental Research and Public Health*. 2022;19.  
684 doi:10.3390/IJERPH19084860
- 685 70. Bekele YA, Fekadu GA. Factors associated with HIV testing among young females; further analysis  
686 of the 2016 Ethiopian demographic and health survey data. *PLOS ONE*. 2020;15: e0228783.  
687 doi:10.1371/JOURNAL.PONE.0228783
- 688 71. Ejigu Y, Tadesse B. HIV testing during pregnancy for prevention of mother-to-child transmission of  
689 HIV in Ethiopia. *PLoS ONE*. 2018;13. doi:10.1371/JOURNAL.PONE.0201886
- 690 72. Oginni A, Obianwu O, Adebajo S. Socio-demographic Factors Associated with Uptake of HIV  
691 Counseling and Testing (HCT) among Nigerian Youth. *AIDS Research and Human Retroviruses*.  
692 2014;30: A113–A113. doi:10.1089/AID.2014.5216.ABSTRACT
- 693 73. Mahande MJ, Phimemon RN, Ramadhani HO. Factors associated with changes in uptake of HIV  
694 testing among young women (aged 15-24) in Tanzania from 2003 to 2012. *Infectious Diseases of  
695 Poverty*. 2016;5: 1–12. doi:10.1186/S40249-016-0180-3/TABLES/5
- 696 74. Steele LS, Dewa CS, Lin E, Lee KKK. Education Level, Income Level and Mental Health Services Use  
697 in Canada: Associations and Policy Implications. *Healthcare Policy*. 2007;3: 96.  
698 doi:10.12927/hcpol.2007.19177

699

It is made available under a [CC-BY 4.0 International license](#) .

700

701

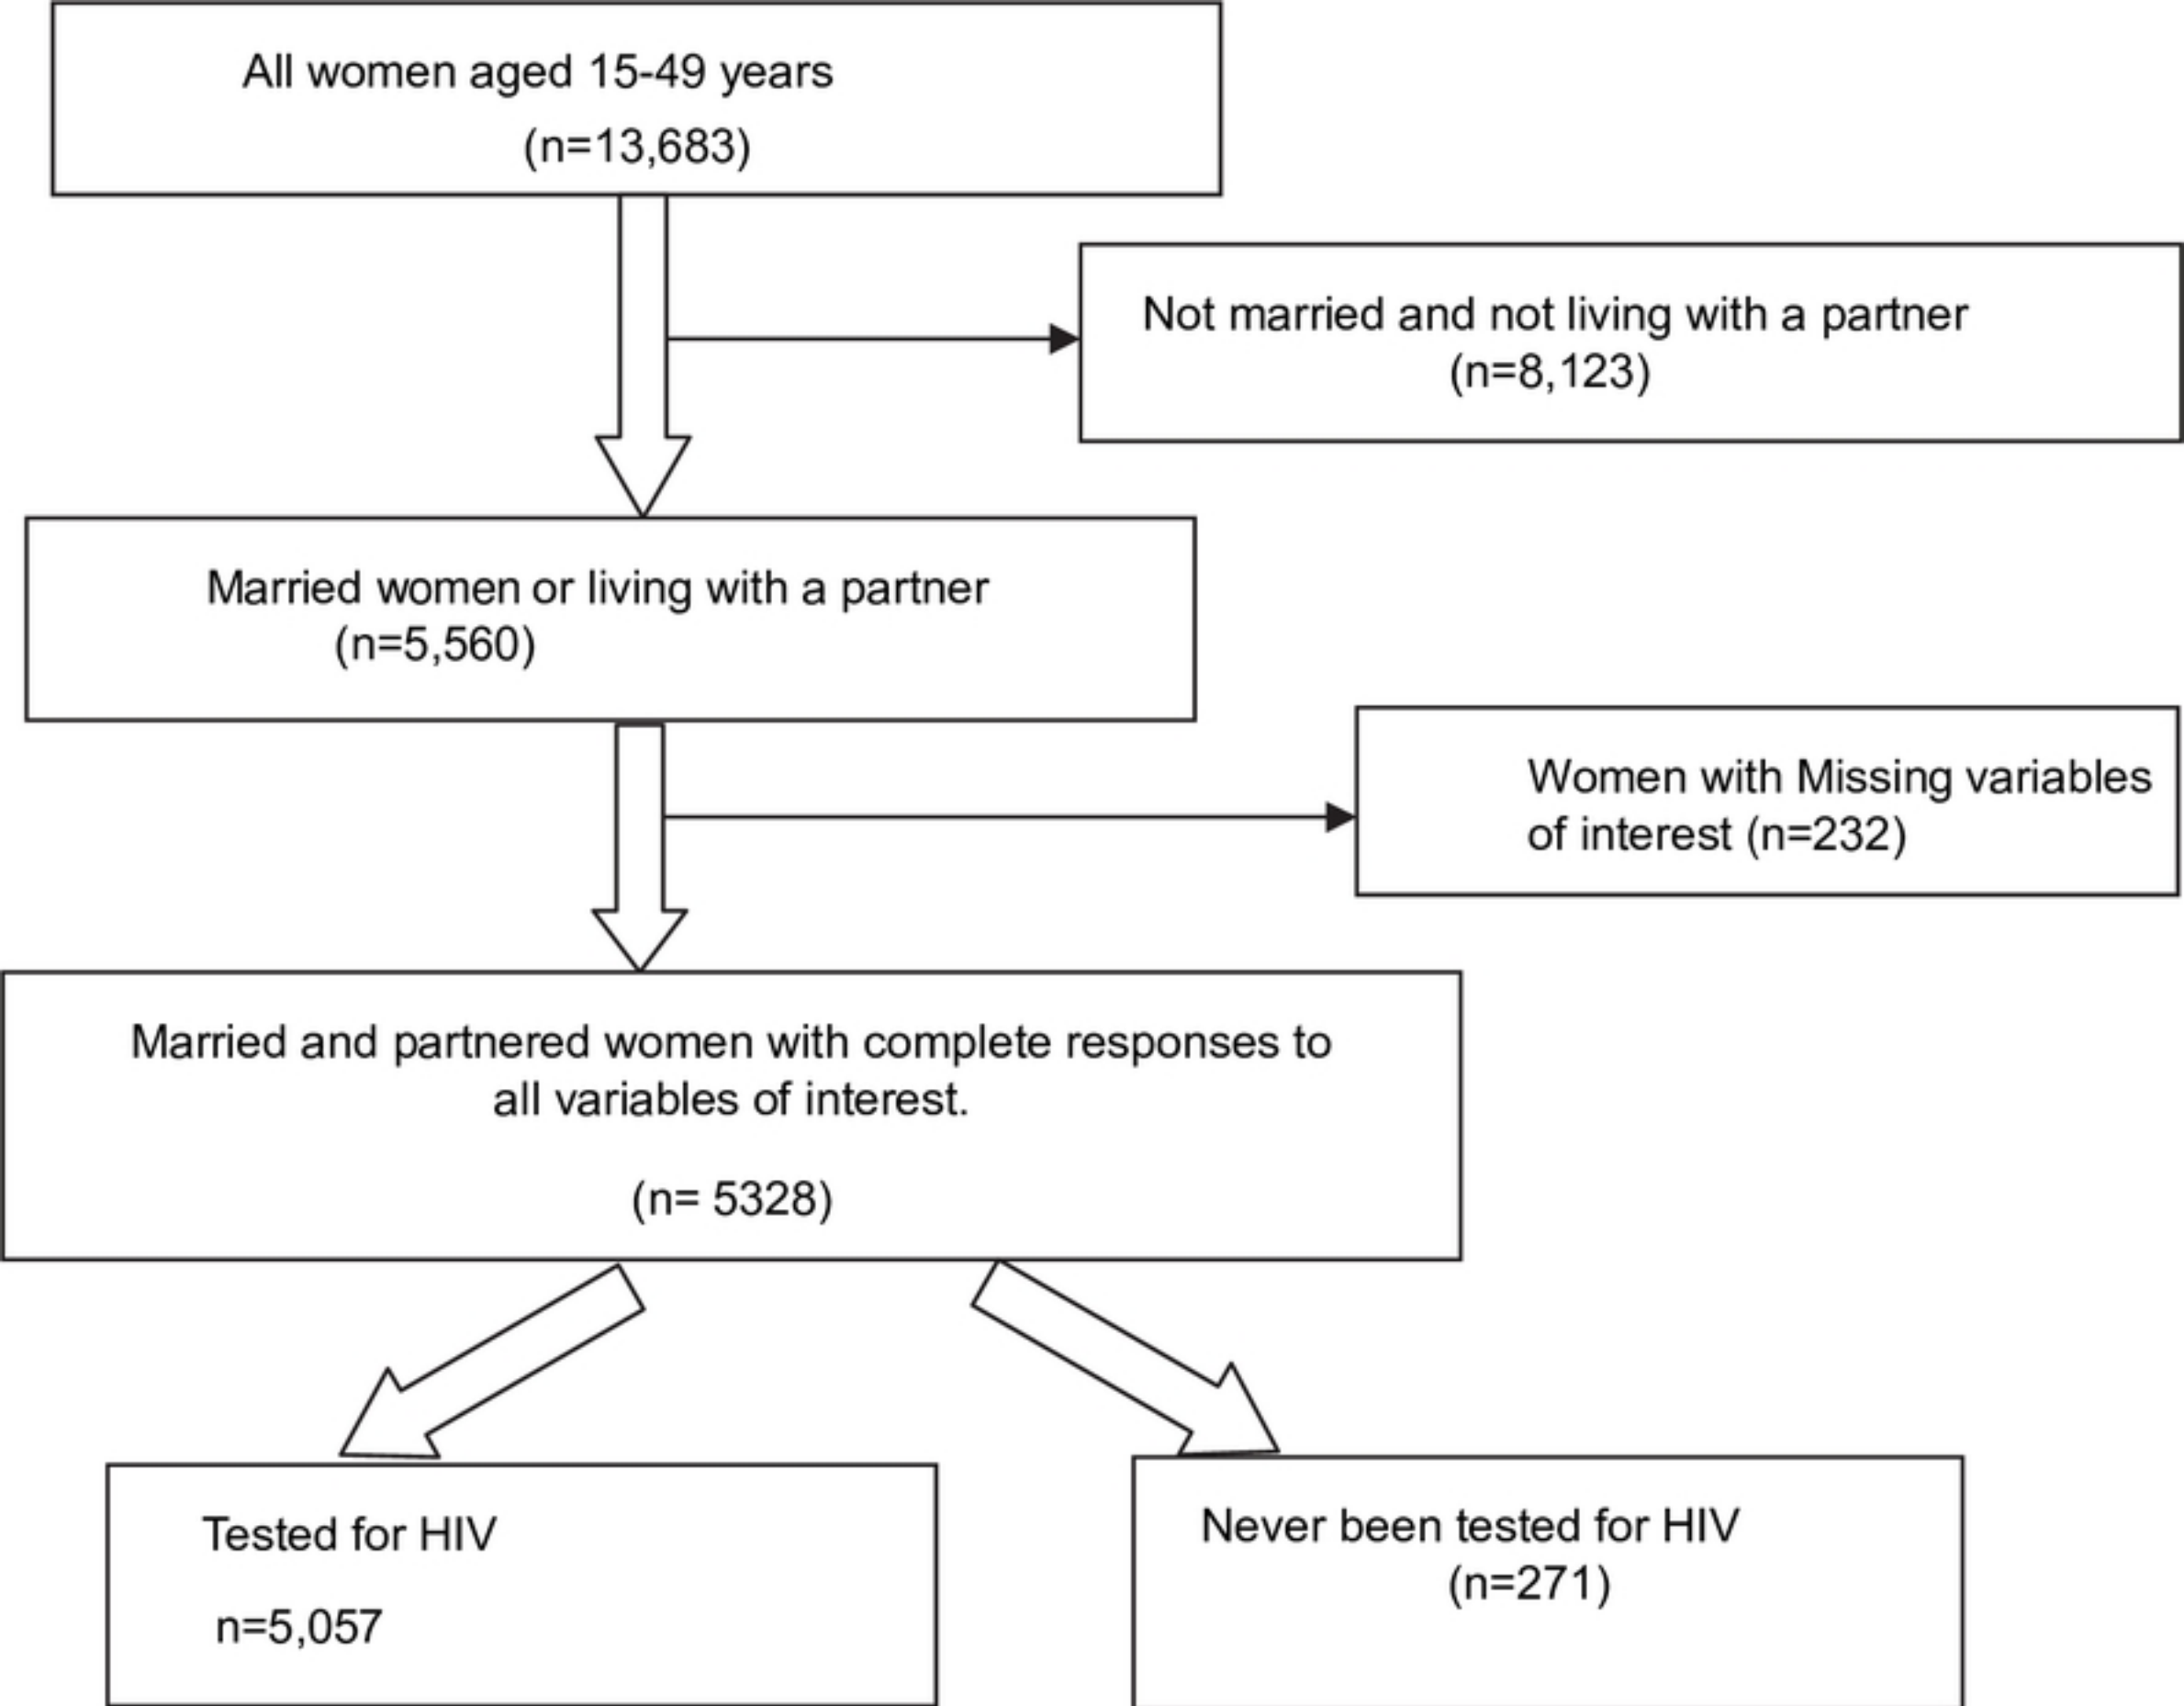

Figure
